# Supplementary material for: Temperature dependent Raman and photoresponse studies of Bi2Te3 thin films annealed at different temperatures for improved optoelectronic performance
Source: Royal Society of Chemistry journal article supplement (doi:10.1039/d3ma01044a), 2024-01-01
Supplement: d3ma01044a1.pdf [file d3ma01044a1.pdf]

**Supporting Information**

**Temperature dependence Raman and photo response study of  
Bi<sub>2</sub>Te<sub>3</sub> thin films annealed at different temperatures for improved  
optoelectronic performance**

S. Das<sup>1</sup>, S. Senapati<sup>1</sup>, D. Alagarasan<sup>2</sup>, R. Naik<sup>1\*</sup>

*<sup>1</sup>Department of Engineering and Materials Physics, Institute of Chemical Technology-Indian  
Oil Odisha Campus, Bhubaneswar, 751013, India*

*<sup>2</sup>Nitte Meenakshi Institute of Technology, Yelahanka, Bengaluru, 560064, India*

*\*Corresponding author: [ramakanta.naik@gmail.com](mailto:ramakanta.naik@gmail.com)*

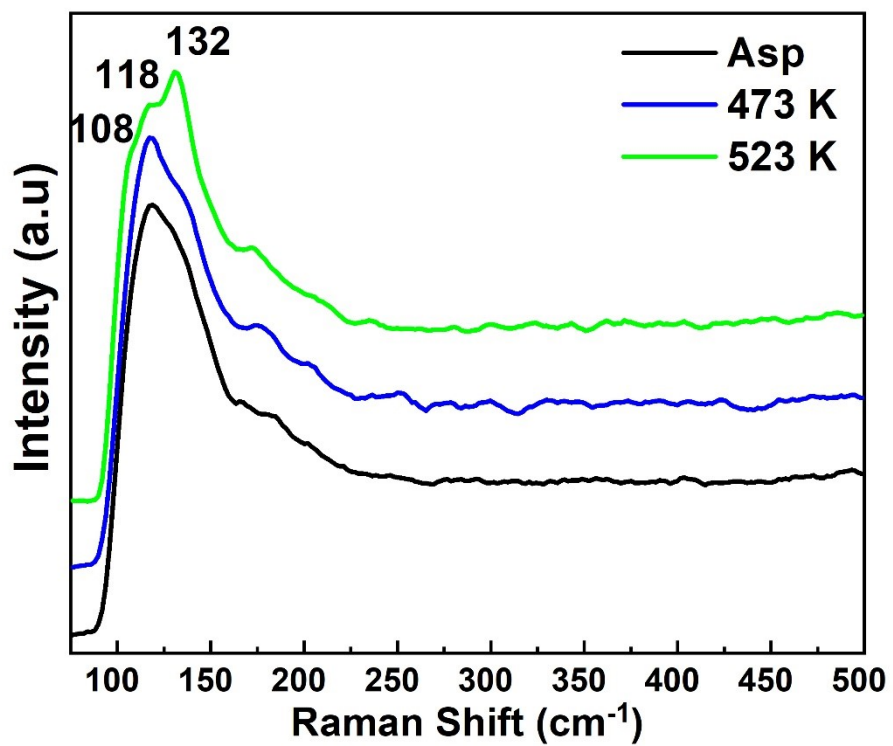

**Fig. S1.** Raman spectra of as-grown, 473 K and 523 K annealed thin films.

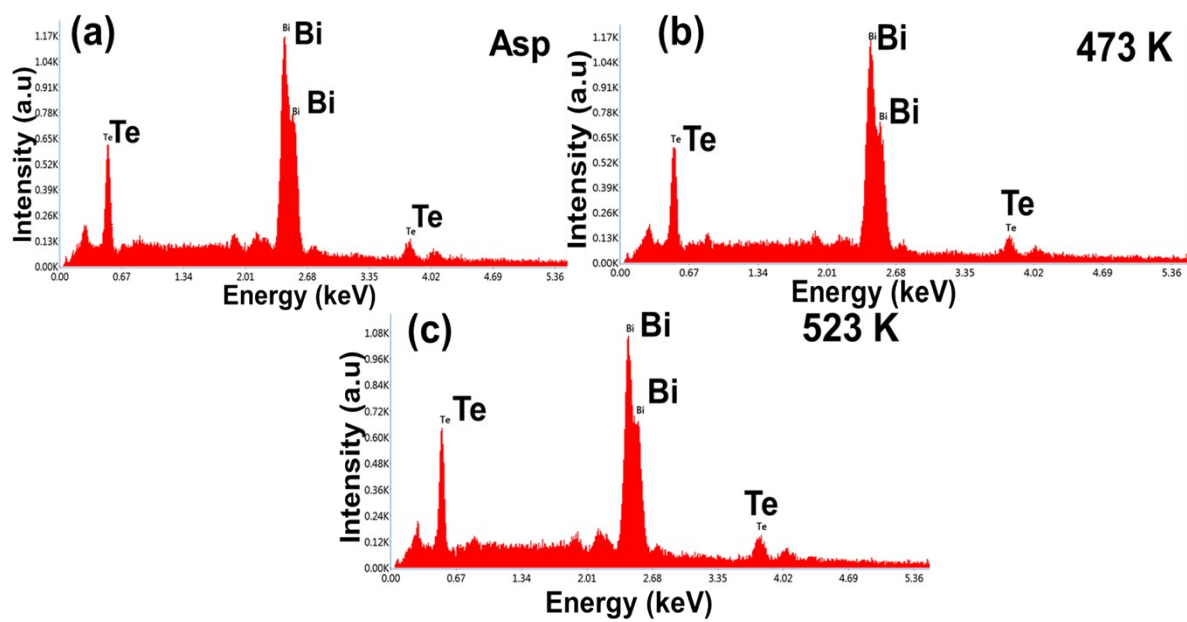

**Fig.S2** EDX spectra of (a) as-grown, (b) 473 K and (c) 523 K annealed Bi<sub>2</sub>Te<sub>3</sub> thin film.

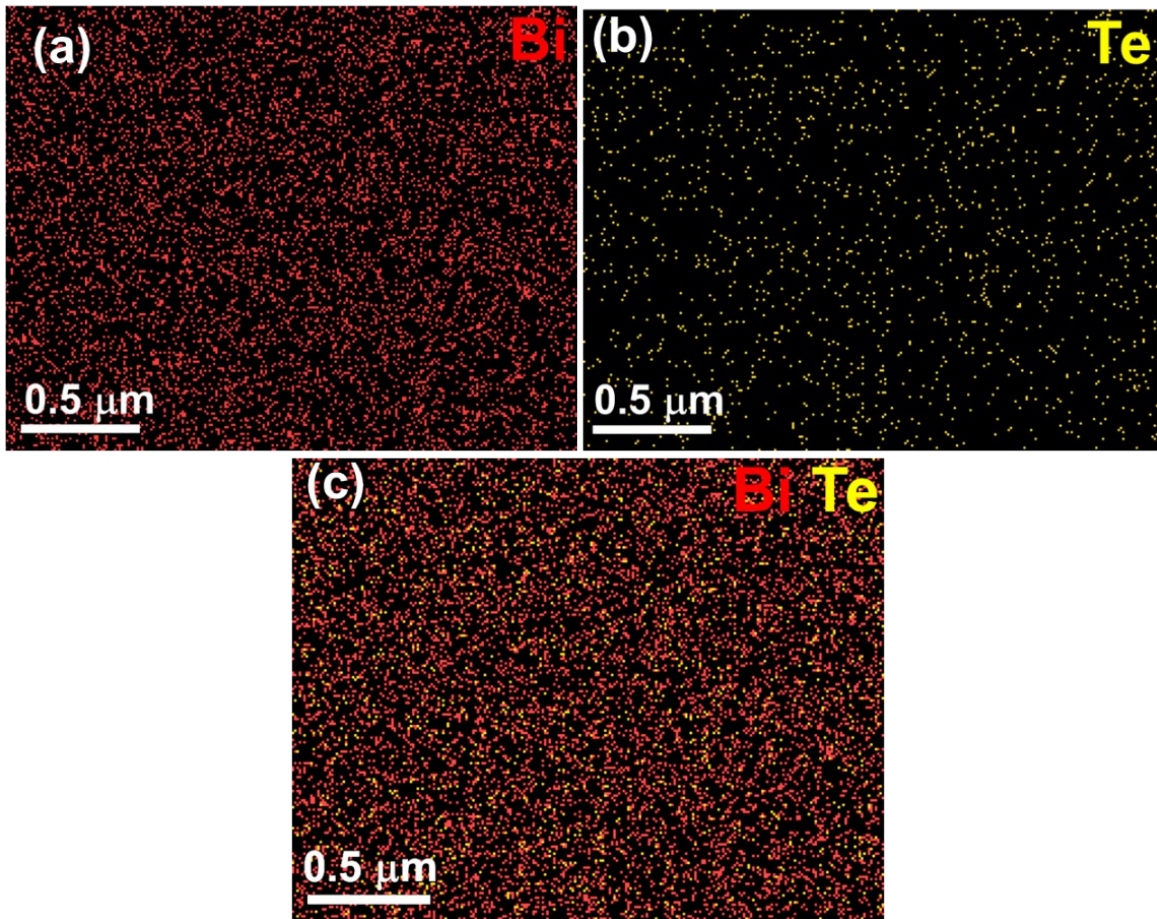

**Fig. S3** Elemental mapping of (a) Bi, (b) Te and (c) overall portion of 523 K annealed  $\text{Bi}_2\text{Te}_3$  thin film.

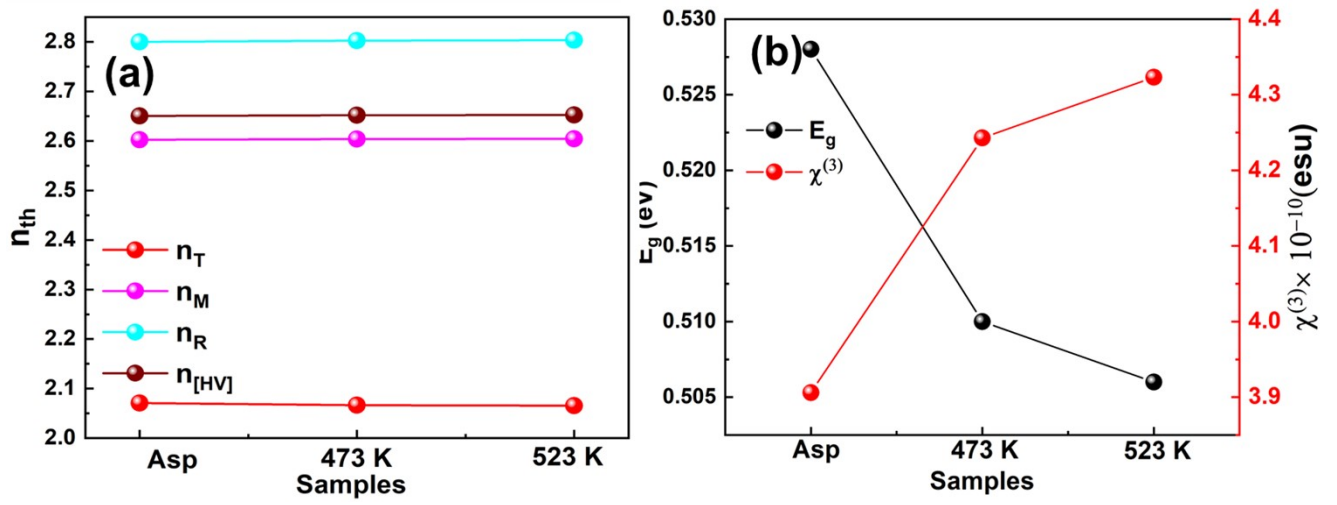

**Fig. S4** (a) Variation of theoretically calculated refractive index of different samples from various models and (b) Plot between optical bandgap and third order susceptibility of as-prepared and annealed  $\text{Bi}_2\text{Te}_3$  thin films.

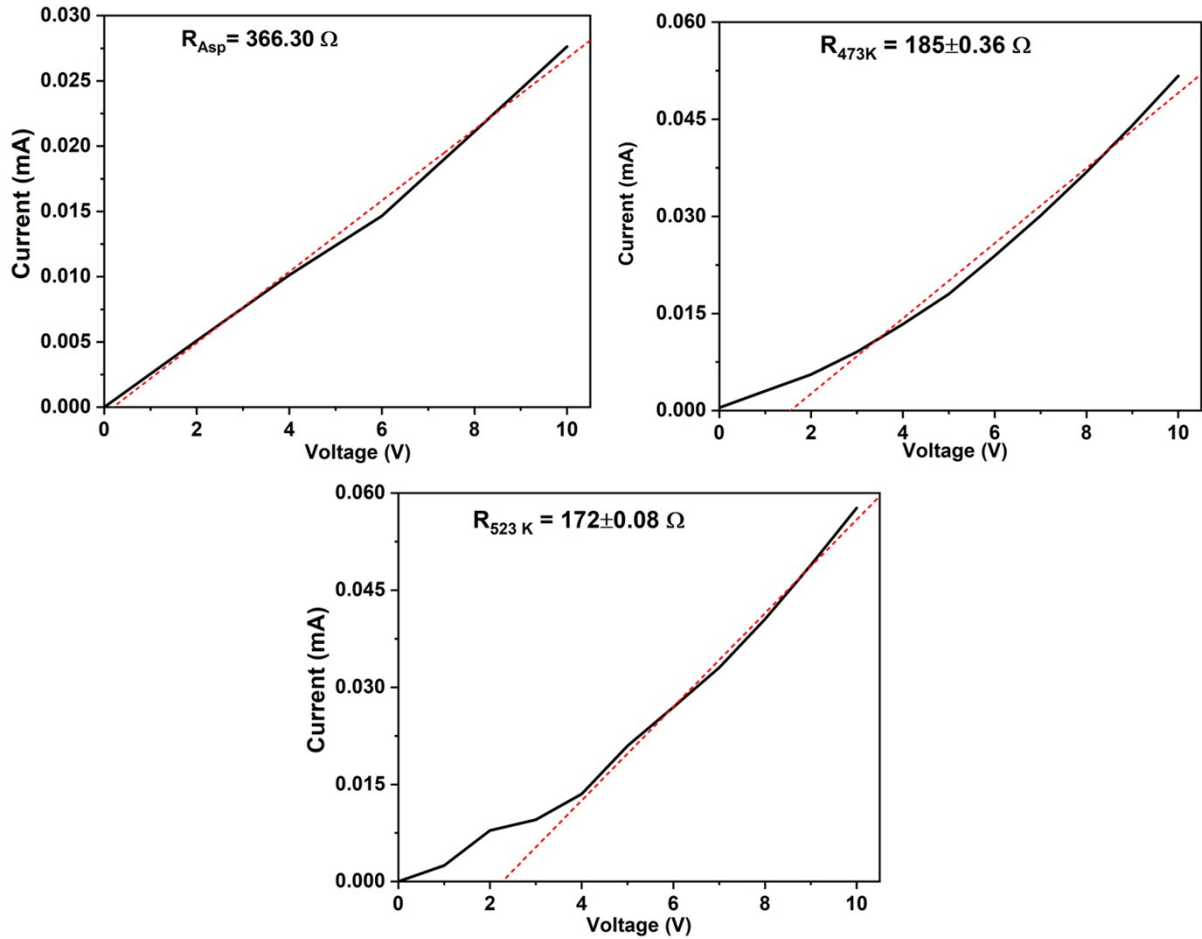

**Fig. S5** Resistance measurement of (a) as-grown, (b) 473 K and (c) 523 K annealed Bi<sub>2</sub>Te<sub>3</sub> thin films

**Table S1.** Comparative study of parameters for Bi<sub>2</sub>Te<sub>3</sub> photodetector applications

| Material                                   | Synthesis Techniques | Detectivity (Jones)   | Responsivity (AW <sup>-1</sup> ) | EQE (%)     | Wavelength (nm)  | Ref. |
|--------------------------------------------|----------------------|-----------------------|----------------------------------|-------------|------------------|------|
| Bi <sub>2</sub> Te <sub>3</sub> /Si        | MBE                  |                       | 3.64 x10 <sup>-3</sup>           | 0.9         | 1064             | [1]  |
|                                            |                      |                       | 3.32 x 10 <sup>-2</sup>          | 7.4         | 1550             |      |
| Bi <sub>2</sub> Te <sub>3</sub> nanoplates | Solvothermal         |                       | 395 x 10 <sup>-6</sup>           |             | 365              | [2]  |
| Bi <sub>2</sub> Te <sub>3</sub> nanoplates | vdWe                 | 5.92x10 <sup>7</sup>  | 55.06 x 10 <sup>-3</sup>         |             | 850              | [3]  |
| Bi <sub>2</sub> Te <sub>3</sub> nanoplates | CVD                  | 1.54x10 <sup>10</sup> | 23.43                            |             | 650              | [4]  |
| Graphene-Bi <sub>2</sub> Te <sub>3</sub>   | CVD                  |                       | 35                               |             | 532              | [5]  |
| Bi <sub>2</sub> Te <sub>3</sub> nanosheets | FIB milling          | 1.29x10 <sup>9</sup>  | 26.82                            | 102         | 325              | [6]  |
|                                            |                      | 1.5x10 <sup>9</sup>   | 24.72                            | 57.72       | 532              |      |
|                                            |                      | 3.8x10 <sup>9</sup>   | 74.32                            | 59.56       | 1550             |      |
| Bi <sub>2</sub> Te <sub>3</sub> Nanowire   |                      | 4x10 <sup>9</sup>     | 238                              | 909.61<br>1 | 325              |      |
|                                            |                      | 4.5x10 <sup>9</sup>   | 251                              | 586.15      | 532              |      |
|                                            |                      | 1.2x10 <sup>9</sup>   | 778                              | 623.59      | 1550             |      |
| Bi <sub>2</sub> Te <sub>3</sub>            | Vapor solid method   | 6.6 x 10 <sup>9</sup> | 286                              |             | 1550             | [7]  |
| Bi <sub>2</sub> Te <sub>3</sub> /PbS QDs   | Colloidal            | 1.6x10 <sup>9</sup>   | 16x10 <sup>-3</sup>              |             | 660              | [8]  |
|                                            |                      | 1.35x10 <sup>10</sup> | 13.5x10 <sup>-3</sup>            |             | 850              |      |
| Bi <sub>2</sub> Te <sub>3</sub> /graphene  | Hydrothermal         |                       | 2.2 x 10 <sup>-3</sup>           |             | Xenon lamp(150W) | [9]  |
| Bi <sub>2</sub> Te <sub>3</sub> /pentacene |                      |                       | 14.89                            | 2840        | 450-3500         | [10] |
| Gr/Bi <sub>2</sub> Te <sub>3</sub> /GaAs   | Epitaxial growth     | 3.1 x10 <sup>12</sup> | 667.5 x 10 <sup>-3</sup>         |             | 785              | [11] |
|                                            |                      | 3.41x10 <sup>10</sup> | 6.69 x 10 <sup>-3</sup>          |             | 1550             |      |

## References

- [1] J. Liu, Y. Li, Y. Ma, Q. Chen, Z. Zhu, P. Lu and S. Wang, Bi<sub>2</sub>Te<sub>3</sub> photoconductive detectors on Si, *Appl. Phys. Lett.*, 2017, **110**, 141109.
- [2] Y. Zhang, Q. You, W. Huang, L. Hu, J. Ju, Y. Ge and H. Zhang, Few-layer hexagonal bismuth telluride (Bi<sub>2</sub>Te<sub>3</sub>) nanoplates with high-performance UV-Vis photodetection, *Nanoscale Adv.*, 2020, **2**, 1333.
- [3] J.L. Liu, H. Wang, X. Li, H. Chen, Z.K. Zhang, W.W. Pan, G.Q.Luo, C.L. Yuan, Y.L. Ren and W. Lei, Ultrasensitive flexible near-infrared photodetectors based on Van der Waals Bi<sub>2</sub>Te<sub>3</sub> nanoplates, *Appl. Surf. Sci.*, 2019, **484**, 542-550.

- [4] J.L. Liu, H. Wang, X. Li, H. Chen, Z.K. Zhang, W.W. Pan, G.Q. Luo, C.L. Yuan, Y.L. Ren, and W. Lei, High performance visible photodetectors based on thin two-dimensional Bi<sub>2</sub>Te<sub>3</sub> Nanoplates, *J. Alloys Compd.*, 2019, **798**, 656-664.
- [5] H. Qiao, J. Yuan, Z. Xu, C. Chen, S. Lin, Y. Wang, J. Song, Y. Liu, Q. Khan, H. Y. Hoh, C-X. Pan, S. Li and Q. Bao, Broadband photodetectors based on graphene-Bi<sub>2</sub>Te<sub>3</sub> heterostructure, *ACS Nano*, 2015, **9**, 1886–1894.
- [6] A. Sharma, A. K. Srivastava, T. D. Senguttuvan and S. Husale, Robust broad spectral photodetection (UV-NIR) and ultra-high responsivity investigated in nanosheets and nanowires of Bi<sub>2</sub>Te<sub>3</sub> under harsh nano-milling conditions, *Sci. Rep.* **7**, 2017, **7**, 17911.
- [7] A. Sharma, T. D. Senguttuvan, V. N. Ojha and Sudhir Husale, Novel synthesis of topological insulator based nanostructures (Bi<sub>2</sub>Te<sub>3</sub>) demonstrating high-performance photodetection, *Sci. Rep.* 2019, **9**, 3804.
- [8] L. Yu, P. Tian, L. Tang, W. Zuo, H. Zhong, Q. Hao, K. S. Teng, G. Zhao, R. Su, X. Gong, and J. Yuan, Room temperature broadband Bi<sub>2</sub>Te<sub>3</sub>/PbS colloidal quantum dots infrared photodetectors, *Sensors*, 2023, **23**, 4328.
- [9] B. Wang, Z. Huang, P. Tang, S. Luo, Y. Liu, J. Li and X. Qi, One-pot synthesized Bi<sub>2</sub>Te<sub>3</sub>/graphene for a self-powered photoelectrochemical-type photodetector, *Nanotechnology*, 2020, **31**, 115201.
- [10] M. Yang, J. Wang, Y. Zhao, L. He, C. Ji, X. Liu, H. Zhou, Z. Wu, X. Wang and Y. Jiang, Three-Dimensional topological insulator Bi<sub>2</sub>Te<sub>3</sub>/organic thin film heterojunction photodetector with fast and wideband response from 450 to 3500 nanometers, *ACS Nano*, 2019, **13**, 755–763.
- [11] X. Zhang, X. Liu, C. Zhang, S. Peng, H. Zhou, L. He, J. Gou, X. Wang and J. Wang, Epitaxial topological insulator Bi<sub>2</sub>Te<sub>3</sub> for fast visible to mid-infrared heterojunction photodetector by graphene as charge collection medium, *ACS Nano*, 2022, **16**, 4851–4860.
